# Supplementary material for: “Targeted Sequencing by Gene Synteny,” a New Strategy for Polyploid Species: Sequencing and Physical Structure of a Complex Sugarcane Region
Source: Front Plant Sci. 2018 Mar 28;9:397. doi: 10.3389/fpls.2018.00397 (PMC5882829; doi:10.3389/fpls.2018.00397)
Supplement: Table S3 — Distribution of the predicted transposable elements among the annotated BAC sequences. [file Table3.XLSX]

## Sheet: Sheet1
	DNA transposon						LTR retrotransposon		Non-LTR
	EnSpm/CACTA	Harbinger	Helitron	Mariner/Tc1	MuDR	hAT	Copia	Gypsy	L1	RTE	SINE	TOTAL
Shy3280Sca001
Fragments (F)	13	3	9	6	10	1	19	41	2	1	0	105
Length (L)	2624	565	1532	815	1245	72	16830	21267	217	75	0	45242
Shy3280Sca002
F	13	11	6	5	9	5	9	39	6	0	0	103
L	3290	1983	1094	819	1018	1502	19244	30447	5791	0	0	65188
Shy3280Sca003
F	3	20	3	9	19	23	34	35	17	1	0	164
L	328	3681	329	1765	3124	3238	38363	15091	1682	51	0	67652
Shy3280Sca004
F	7	12	3	11	11	14	15	24	5	0	0	102
L	787	2402	262	1914	1671	1179	14244	8960	4844	0	0	36263
Shy3280Sca005
F	7	12	3	9	11	13	14	24	4	0	0	97
L	789	2402	262	1656	1724	1013	14027	8798	4786	0	0	35457
Shy3280Sca006
F	6	21	4	12	4	11	24	12	3	2	0	99
L	546	4161	435	1900	750	2018	27579	14527	223	925	0	53064
Shy3280Sca007
F	21	23	4	2	20	13	33	36	13	1	1	167
L	11106	3451	449	290	4729	2567	31017	41566	8478	449	265	104367
Shy3280Sca008
F	9	7	2	2	15	3	30	21	1	0	1	91
L	9918	1085	234	397	3806	475	24725	22752	66	0	265	63723
Shy3280Sca009
F	6	20	3	3	12	14	16	38	10	2	0	124
L	813	3719	543	686	2705	4326	21082	43469	2623	229	0	80195
Shy3280Sca010
F	7	18	1	3	7	18	19	56	8	2	0	139
L	872	3126	186	685	798	4850	26942	33284	4912	229	0	75884
Shy3280Sca011
F	12	5	1	4	9	9	9	30	2	0	1	82
L	2499	536	69	839	6892	1124	7908	53485	1852	0	269	75473
Shy3280Sca012
F	8	20	4	8	6	19	26	25	12	4	0	132
L	1131	3606	572	2121	1196	5134	26041	8739	6583	2960	0	58083
Shy3280Sca013
F	1	18	1	4	4	3	8	6	6	3	0	54
L	222	3059	57	476	984	254	10877	5440	3675	1642	0	26686
Shy3280Sca014
F	2	3	3	2	1	2	13	3	5	1	0	35
L	135	480	421	471	244	374	15178	975	2264	1318	0	21860
Shy3280Sca015
F	9	6	6	4	9	2	9	9	6	0	1	61
L	1212	1407	1282	645	1425	609	12762	5447	5016	0	314	30119
Shy3280Sca016
F	2	3	0	2	6	4	11	36	3	0	0	67
L	243	561	0	142	1521	1545	15101	45352	309	0	0	64774
Shy3280Sca017
F	7	12	4	11	11	14	14	25	5	0	0	103
L	787	2402	345	1914	1724	1179	14027	8853	4844	0	0	36075
Shy3280Sca018
F	3	6	1	0	0	1	4	13	1	0	0	29
L	418	863	97	0	0	547	10449	21194	72	0	0	33640
Shy3280Sca019
F	7	19	5	12	13	16	22	14	0	4	0	112
L	1199	3326	428	1761	6506	3268	9946	7269	0	6166	0	39869
Shy3280Sca020
F	6	21	3	11	3	5	24	25	0	2	0	100
L	615	3870	314	1765	754	539	19071	15611	0	166	0	42705
Shy3280Sca021
F	3	0	2	1	1	0	7	48	1	0	1	64
L	385	0	132	257	147	0	7093	28140	110	0	164	36428
Shy3280Sca022
F	2	0	0	0	0	0	1	51	0	0	0	54
L	334	0	0	0	0	0	2010	43946	0	0	0	46290
Shy3280Sca023
F	2	0	1	0	2	1	8	61	0	0	0	75
L	190	0	101	0	210	70	8821	45962	0	0	0	55354
Shy3280Sca024
F	2	12	5	2	13	3	25	9	5	0	0	76
L	118	2156	580	468	2630	261	33494	20720	679	0	0	61106
Shy3280Sca025
F	7	19	4	11	5	7	8	45	3	2	3	114
L	4419	3624	266	1480	927	1563	4738	36978	558	125	600	55278
Shy3280Sca026
F	0	1	0	2	4	1	16	52	0	1	0	77
L	0	203	0	283	424	138	18434	62464	0	375	0	82321
Shy3280Sca027
F	6	12	5	0	14	9	11	33	1	3	1	95
L	681	2042	573	0	7128	2259	27800	34682	74	3033	70	78342
Shy3280Sca028
F	9	17	5	2	12	4	14	18	6	0	2	89
L	1515	2930	433	137	2492	699	13437	4746	1046	0	272	27707
Shy3280Sca029
F	4	1	10	1	13	6	12	24	1	0	0	72
L	1596	142	1181	240	9355	1018	12882	17103	71	0	0	43588
Shy3280Sca030
F	14	14	3	2	10	14	25	32	7	0	0	121
L	7620	2664	675	457	7979	2123	15634	43108	2763	0	0	83023
Shy3280Sca031
F	7	18	0	7	7	6	14	14	11	0	0	84
L	1311	6577	0	1028	1048	2084	26918	2690	3235	0	0	44891
Shy3280Sca032
F	2	4	1	2	7	1	10	5	0	1	1	34
L	304	916	64	265	5292	164	22123	4231	0	893	108	34360
Shy3280Sca033
F	15	5	2	2	3	4	5	2	0	0	1	39
L	3553	796	66	160	440	537	4251	4973	0	0	330	15106
Shy3280Sca034
F	10	8	5	7	5	5	17	27	6	3	3	96
L	1065	1509	409	1082	528	752	27674	23663	3631	2973	454	63740
Shy3280Sca035
F	2	14	0	2	5	0	13	18	0	1	0	55
L	422	2768	0	275	2225	0	25830	16151	0	1162	0	48833
Shy3280Sca036
F	1	1	0	0	1	1	5	15	6	0	1	31
L	77	77	0	0	276	129	11829	25249	3826	0	288	41751
Shy3280Sca037
F	19	0	0	0	1	6	9	7	7	0	0	49
L	10918	0	0	0	88	421	16300	5683	3526	0	0	36936
Shy3280Sca038
F	3	2	2	0	1	0	5	58	1	0	1	73
L	509	411	161	0	303	0	3489	53522	537	0	247	59179
Shy3280Sca039
F	0	2	0	0	2	1	7	11	0	0	0	23
L	0	360	0	0	182	43	18067	11971	0	0	0	30623
Shy3280Sca040
F	4	13	4	10	36	8	17	15	7	3	1	118
L	757	3450	280	3064	28825	3232	14322	24858	4248	1742	31	84809
Shy3280Sca041
F	10	10	6	7	6	4	22	30	12	3	5	115
L	1065	1806	517	1082	784	659	32895	25556	4693	2973	686	72716
Shy3280Sca042
F	11	7	5	1	8	4	17	29	7	0	3	92
L	1195	2521	703	216	1060	258	21247	38240	4305	0	574	70319
Shy3280Sca043
F	12	4	6	3	3	5	15	35	5	0	4	92
L	10264	709	629	609	1214	626	26314	41265	1340	0	450	83420
Shy3280Sca044
F	6	12	7	16	5	7	7	15	0	0	1	76
L	853	2474	5225	2970	787	1042	8675	23421	0	0	197	45644
Shy3280Sca045
F	7	4	0	2	3	5	8	34	2	0	0	65
L	896	742	0	341	467	387	10623	32731	1981	0	0	48168
Shy3280Sca046
F	0	0	0	0	3	1	9	9	1	0	0	23
L	0	0	0	0	276	72	6777	18482	1022	0	0	26629
Shy3280Sca047
F	9	22	1	9	14	7	22	19	11	1	1	116
L	1615	7478	64	1293	6340	2244	40096	6983	3279	893	108	70393
Shy3280Sca048
F	4	5	1	2	6	2	25	28	3	0	1	77
L	825	710	49	460	725	274	48013	11506	702	0	48	63312
Shy3280Sca049
F	0	0	0	0	0	0	0	18	0	0	0	18
L	0	0	0	0	0	0	0	19372	0	0	0	19372
Shy3280Sca050
F	11	10	6	5	4	3	4	9	2	0	1	55
L	1813	2236	1025	1014	608	588	14952	1627	655	0	355	24873
Shy3280Sca051
F	8	5	6	3	8	8	23	65	9	0	1	136
L	1048	1361	1100	446	1262	2025	17157	74470	1456	0	75	100400
Shy3280Sca052
F	10	21	4	10	9	5	24	22	16	0	3	124
L	1478	3804	309	1809	1265	549	22551	9874	4907	0	479	47025
Shy3280Sca053
F	4	10	4	2	6	4	6	40	1	0	1	78
L	387	1874	400	418	2953	3385	5011	46071	81	0	314	60894
Shy3280Sca054
F	1	6	0	1	4	2	8	8	0	0	1	31
L	144	1092	0	285	1803	3910	17308	18609	0	0	292	43443
Shy3280Sca055
F	9	2	3	6	12	10	26	18	13	0	8	107
L	1286	310	273	943	1568	1388	15719	13983	2111	0	872	38453
Shy3280Sca056
F	8	10	6	5	16	6	23	37	9	4	2	126
L	878	1804	593	990	2286	668	23579	21074	5300	1351	215	58738
Shy3280Sca057
F	11	17	6	2	16	3	19	35	2	0	0	111
L	2931	3298	883	342	3435	601	16456	28223	124	0	0	56293
Shy3280Sca058
F	5	25	0	3	11	5	20	12	6	1	2	90
L	1034	6447	0	600	910	1604	24365	22906	687	51	211	58815
Shy3280Sca059
F	4	11	7	5	4	3	11	22	3	0	0	70
L	427	1801	1894	769	624	430	17295	18733	531	0	0	42504
Shy3280Sca060
F	1	0	0	0	0	0	0	1	0	0	0	2
L	122	0	0	0	0	0	0	76	0	0	0	198
Shy3280Sca061
F	5	9	1	4	17	7	36	19	5	2	1	106
L	901	1799	76	678	3203	1151	40670	9623	3029	2202	71	63403
Shy3280Sca062
F	0	0	1	0	3	0	1	132	0	0	0	137
L	0	0	87	0	359	0	74	110621	0	0	0	111141
Shy3280Sca063
F	8	20	3	5	11	7	24	12	7	3	3	103
L	1495	3801	160	902	1022	1169	16367	2060	7233	3333	379	37921
Shy3280Sca064
F	5	12	0	2	6	3	22	15	8	1	1	75
L	934	2789	0	337	397	609	21953	25736	847	1506	39	55147
Shy3280Sca065
F	10	5	5	3	3	1	13	23	2	0	2	67
L	9274	828	443	609	1214	151	17997	18962	906	0	221	50605
Shy3280Sca066
F	14	8	6	5	9	9	4	17	5	1	1	79
L	3202	1684	540	774	1313	1594	6213	3530	202	201	110	19363
Shy3280Sca067
F	6	10	11	1	9	8	0	8	2	0	0	55
L	1271	1635	1424	260	1582	3318	0	3385	148	0	0	13023
Shy3280Sca068
F	0	0	0	0	2	0	18	80	0	0	0	100
L	0	0	0	0	354	0	25355	89926	0	0	0	115635
Total (Fragments)	440	648	210	273	520	386	989	1849	302	53	61
Total (Length (bp))	120646	130313	30226	48404	151126	80008	1188221	1660411	128080	37023	9373
F = number of transposon fragments predicted; L = total length of transposons predicted among contigs.
